# Supplementary material for: CSF-1/CSF-1R axis is associated with epithelial/mesenchymal hybrid phenotype in epithelial-like inflammatory breast cancer
Source: PubMed Central journal article supplement (PMC6013474; doi:10.1038/s41598-018-27409-x), 2018-06-21
Supplement: 41598_2018_27409_MOESM1_ESM.pdf [file 41598_2018_27409_MOESM1_ESM.pdf]

**CSF-1/CSF-1R axis is associated with epithelial/mesenchymal hybrid phenotype  
in epithelial-like inflammatory breast cancer**

Kazuharu Kai<sup>1,2,3</sup>, Takayuki Iwamoto<sup>6</sup>, Dongwei Zhang<sup>2,3</sup>, Li Shen<sup>4</sup>, Yuko Takahashi<sup>6</sup>,  
Arvind Rao<sup>4</sup>, Alastair Thompson<sup>5</sup>, Subrata Sen<sup>1,\*</sup> and Naoto T. Ueno<sup>2,3,\*</sup>

<sup>1</sup>Department of Translational Molecular Pathology, <sup>2</sup>Department of Breast Medical  
Oncology, <sup>3</sup>Morgan Welch Inflammatory Breast Cancer Research Program and Clinic,  
<sup>4</sup>Department of Bioinformatics and Computational Biology and <sup>5</sup>Department of Breast  
Surgical Oncology, The University of Texas MD Anderson Cancer Center, Houston,  
Texas. <sup>6</sup>Department of Breast and Endocrine Surgery, Okayama University Hospital,  
Okayama, Japan.

**\*Corresponding authors:**

Subrata Sen, Ph.D. ([ssen@mdanderson.org](mailto:ssen@mdanderson.org)). Phone: (713) 834-6040; Fax: (713) 745-  
8221

Naoto T. Ueno, M.D., Ph.D., F.A.C.P. ([nueno@mdanderson.org](mailto:nueno@mdanderson.org)). Phone: (713) 792-  
8754; Fax: (713) 794-4385

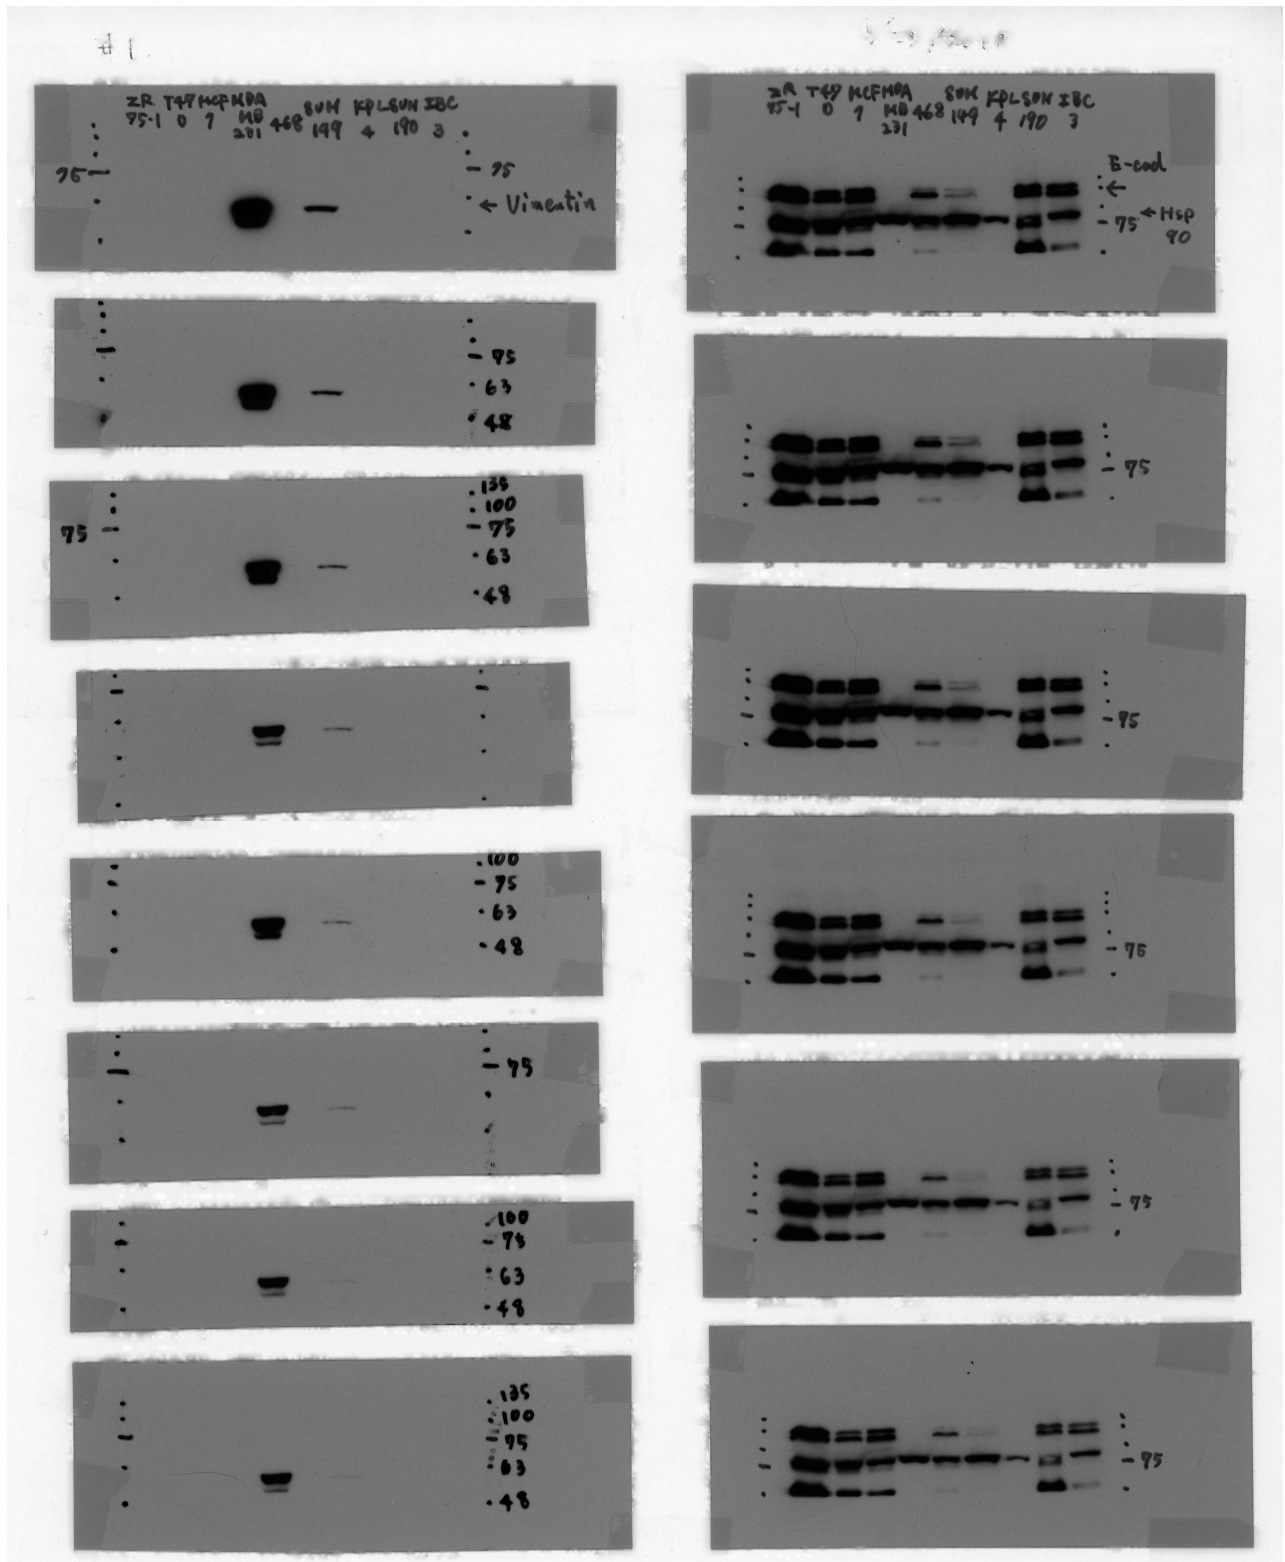

**Supplementary Figure S1. Original blot images for Vimentin (left) and E-cadherin (right) used for Figure 1.** Images are ordered according to the exposure time: long exposure (top) to short (bottom). In the right blots, E-cadherin (molecular weight: 135 kDa) and Hsp90 (molecular weight: 90 kDa) were detected with the same blot.

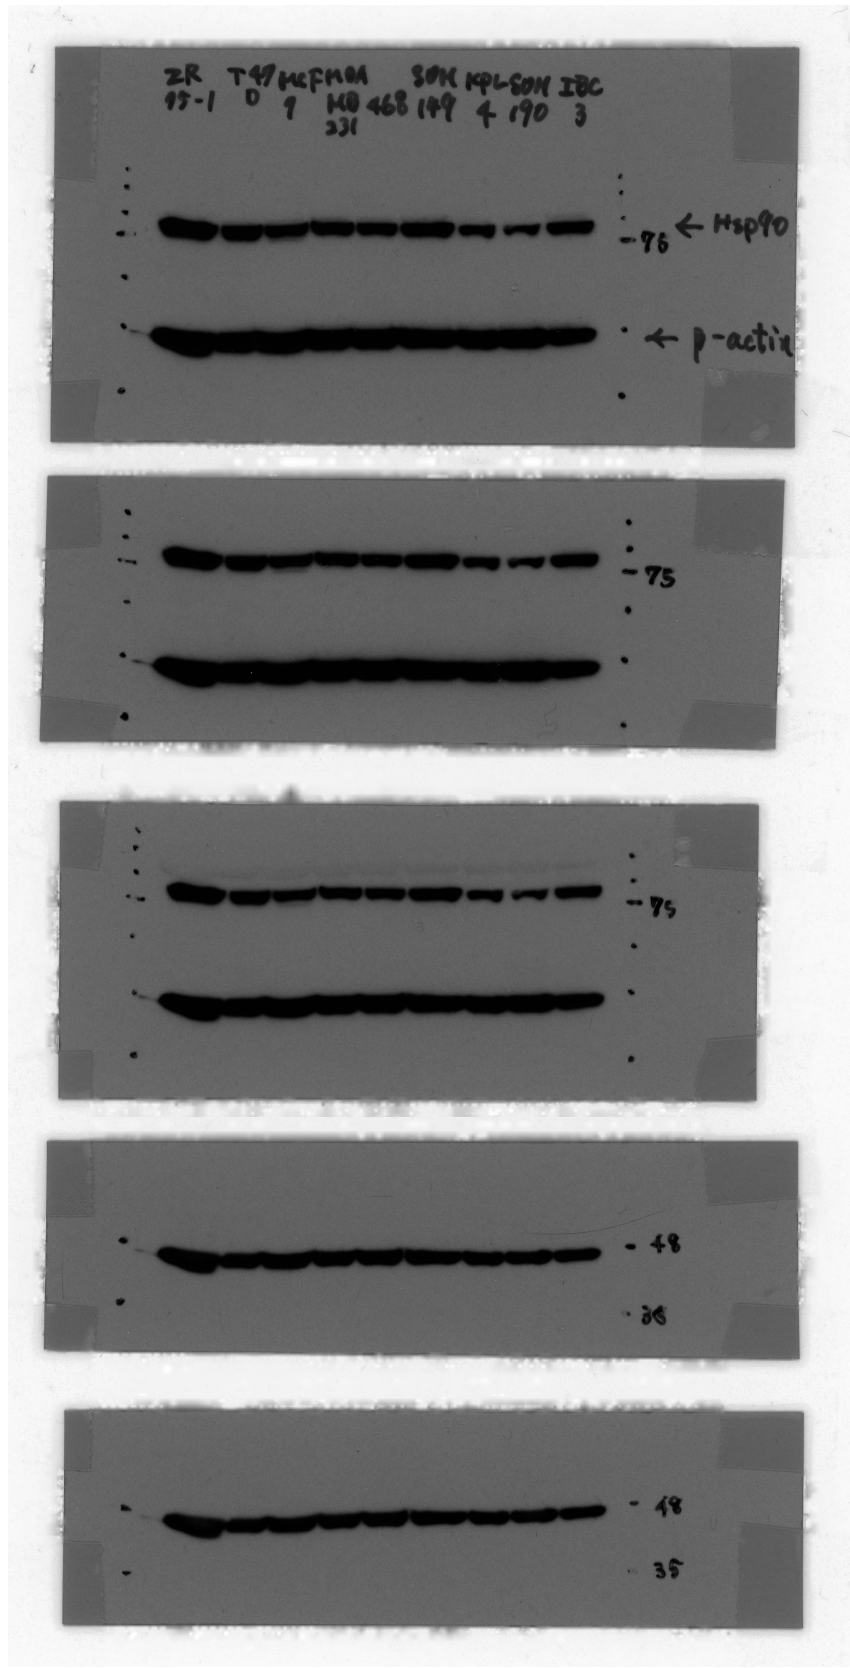

**Supplementary Figure S2. Original blot images for  $\beta$ -actin used for Figure 1A.** Images were taken after stripping antibodies against Vimentin and E-cadherin followed by probing with antibodies against  $\beta$ -actin alone (lower 2 blots) or  $\beta$ -actin and Hsp90 (upper 3 blots). Upper 3 images are derived from the same membrane shown in the left of Supplementary Figure S1. Lower 2 images are derived from the same but a lower part of membrane shown in the right of Supplementary Figure S1.

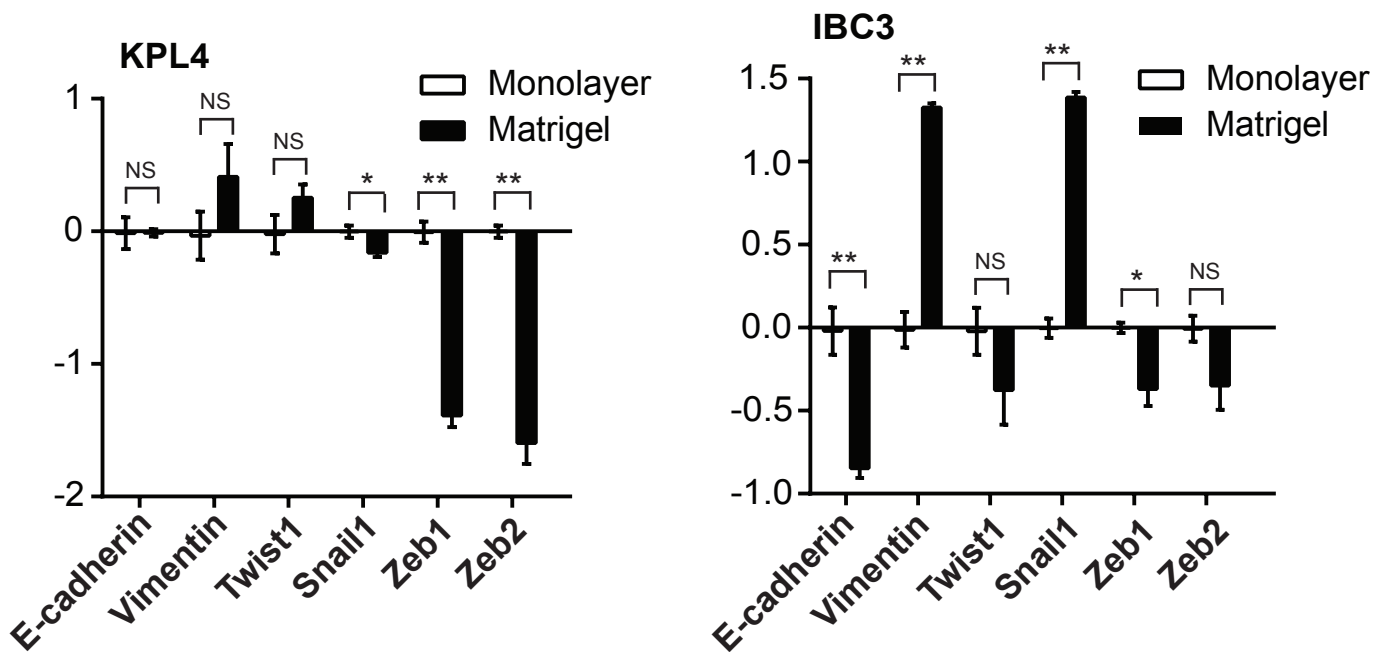

**Supplementary Figure S3. Transcriptional changes in EMT makers induced by Matrigel culture in KPL4 and IBC3 inflammatory breast cancer cells.**

Transcriptional profiling of EMT markers was performed by quantitative RT-PCR with KPL4 and IBC3 inflammatory breast cancer cells cultured in monolayer or Matrigel culture conditions. For each marker, samples from monolayer culture condition were set as a normalizer and all relative expression values were log2 transformed. Bars, standard error of mean.

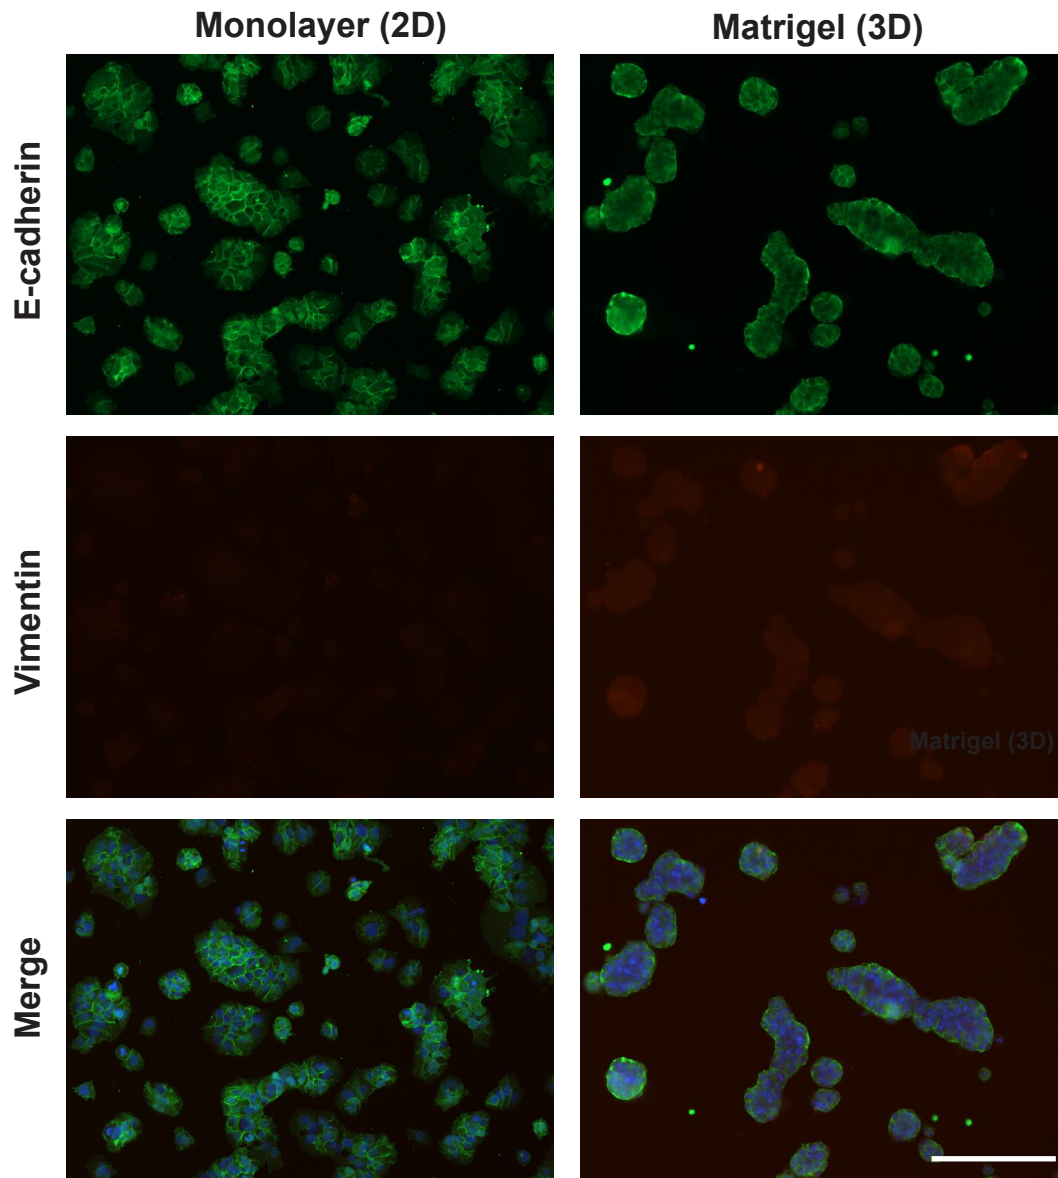

**Supplementary Figure S4. Immunofluorescent analysis for E-cadherin and vimentin in SUM190 cells cultured in monolayer or Matrigel.** Merged images are derived from the images of E-cadherin, vimentin, as well as nuclear counterstaining DAPI (Blue). Bar, 200  $\mu$ m.

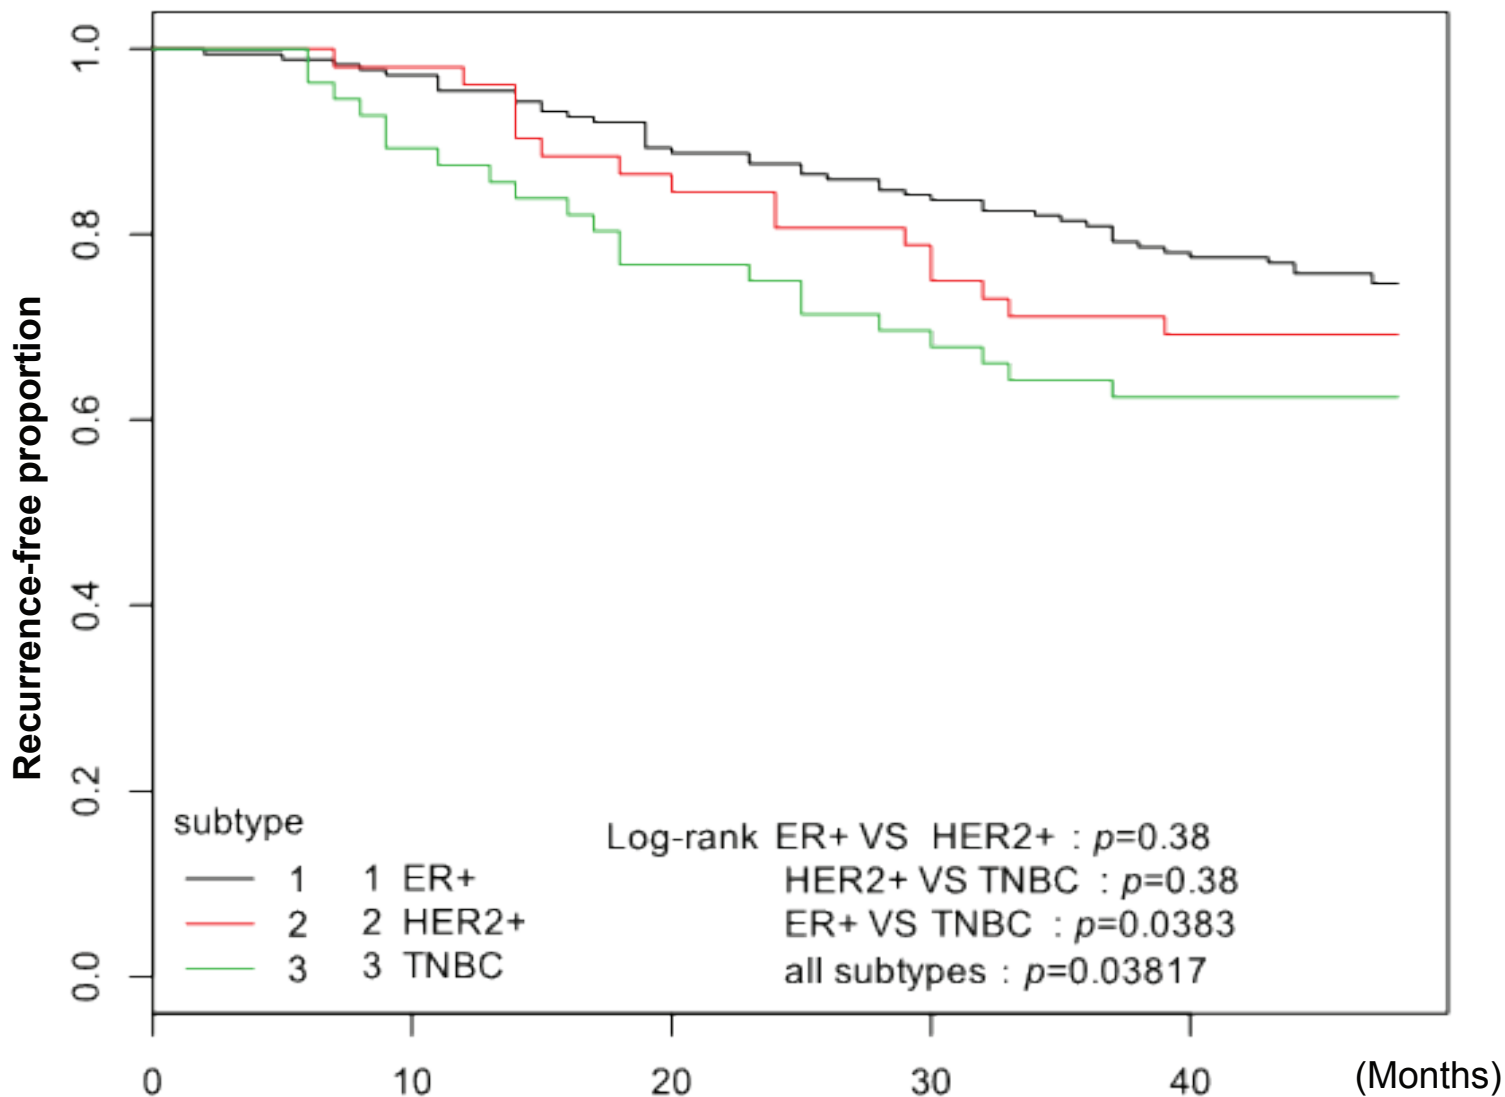

|         |       | Number at risk |     |     |     |     |
|---------|-------|----------------|-----|-----|-----|-----|
| subtype |       | 0              | 10  | 20  | 30  | 40  |
| 1       | ER+   | 178            | 173 | 159 | 150 | 139 |
| 2       | HER2+ | 52             | 51  | 45  | 41  | 36  |
| 3       | TNBC  | 56             | 50  | 43  | 39  | 35  |

**Supplementary Figure S5. Kaplan-Meier curve for recurrence free survival in primary breast cancers (Wang *et al*, Lancet 2005) according to molecular subtypes.** Logrank tests were conducted for the comparisons between two subtypes and for all three subtypes.

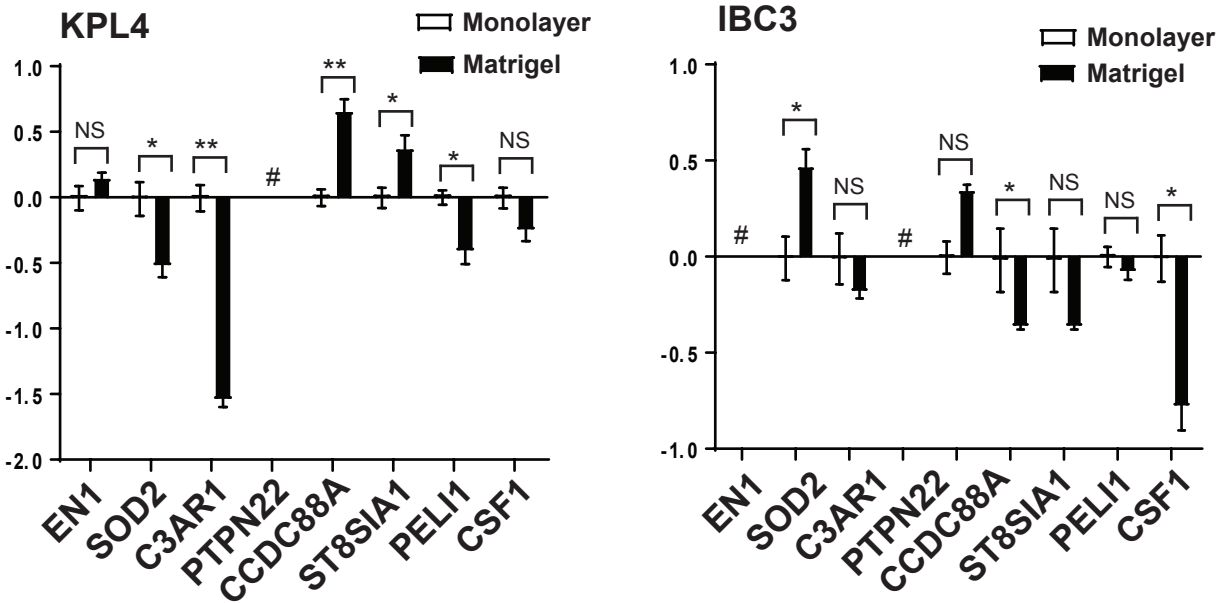

**Supplementary Figure S6. Transcriptional changes in inflammatory-related genes induced by Matrigel culture in KPL4 and IBC3 inflammatory breast cancer cells.** Transcriptional profiling of inflammatory-related genes was performed by quantitative RT-PCR with KPL4 and IBC3 inflammatory breast cancer cells cultured in monolayer or Matrigel culture conditions. For each gene, samples from monolayer culture condition were set as a normalizer and all relative expression values were log2 transformed. Bars, standard error of mean.

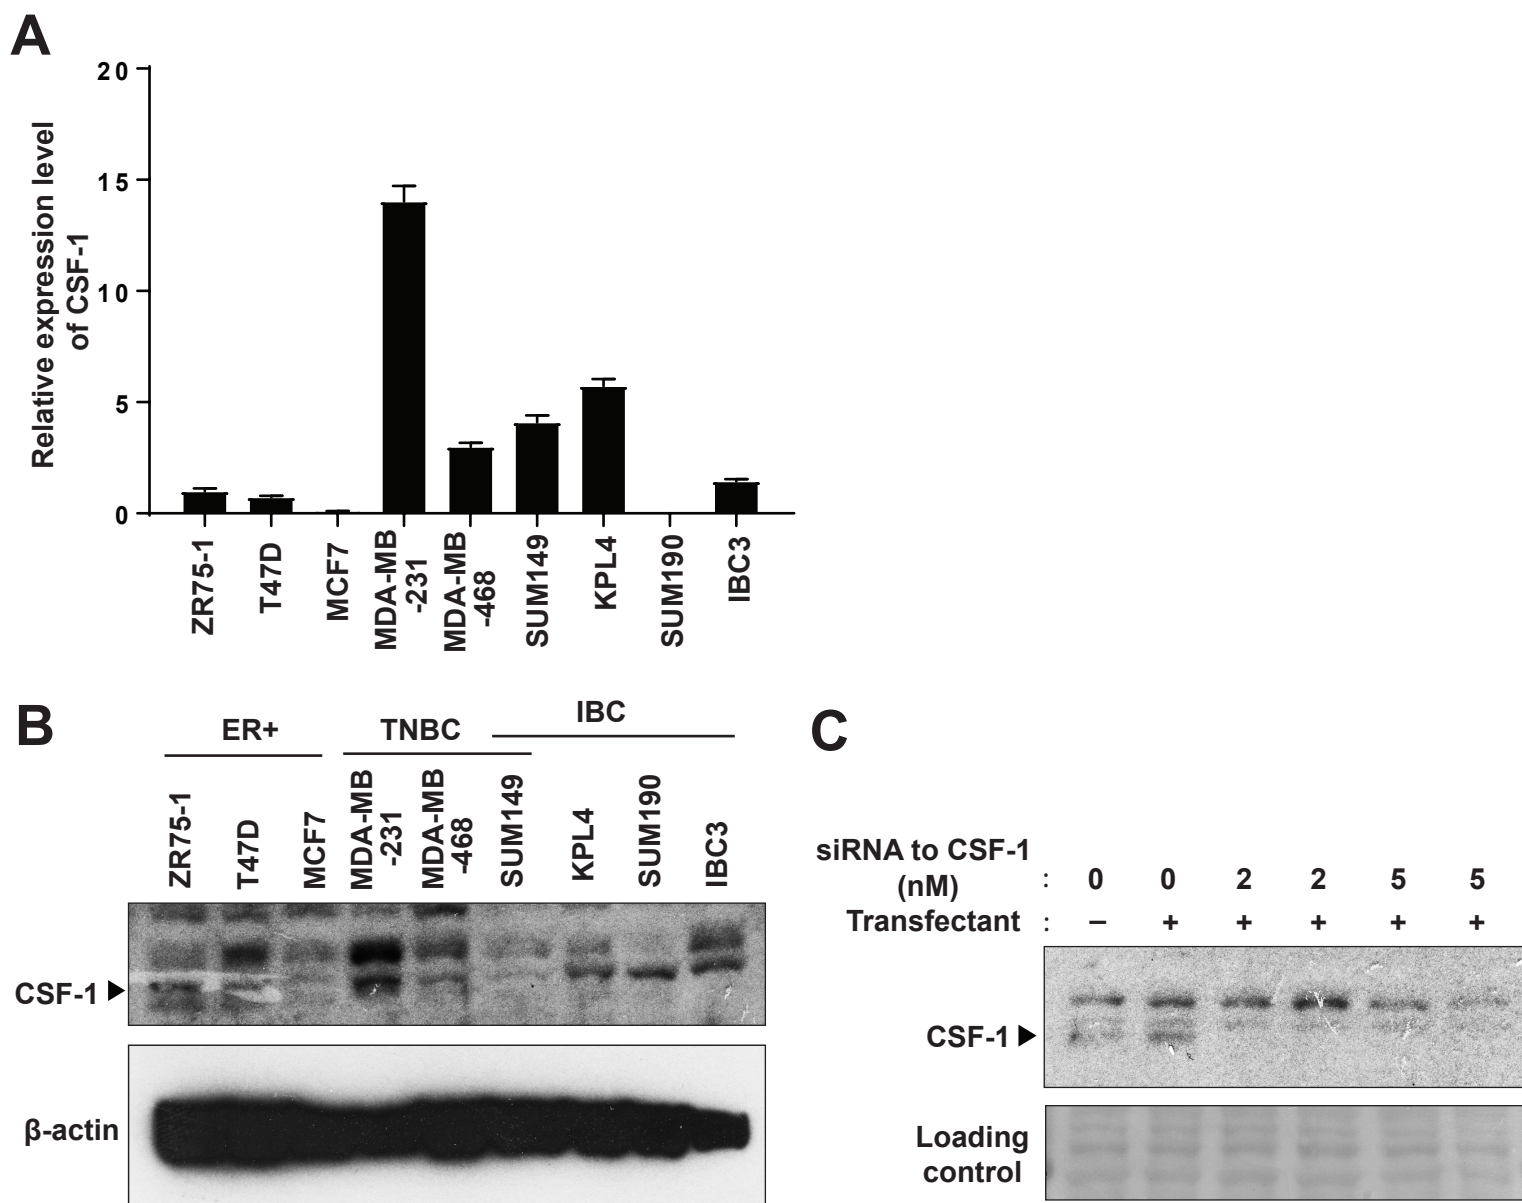

**Supplementary Figure S7. Transcriptional and protein expressions of CSF-1 in a panel of breast cancer cells.** **A**, transcriptional expressions of CSF-1 determined by TaqMan RT-PCR. ZR75-1 is a normalizer (set as the expression value=1) and other cell lines' values are relative values to the ZR-75-1's. The values are log2 transformed. **B**, protein expressions of CSF-1 detected by western blots. Arrowhead indicates the band that corresponds to CSF-1 (defined by **C**).  $\beta$ -actin, loading control. **C**, Knocking down of CSF-1 with siRNA to CSF-1 in MDA-MB-231 cells, which confirmed the band corresponding to CSF-1.



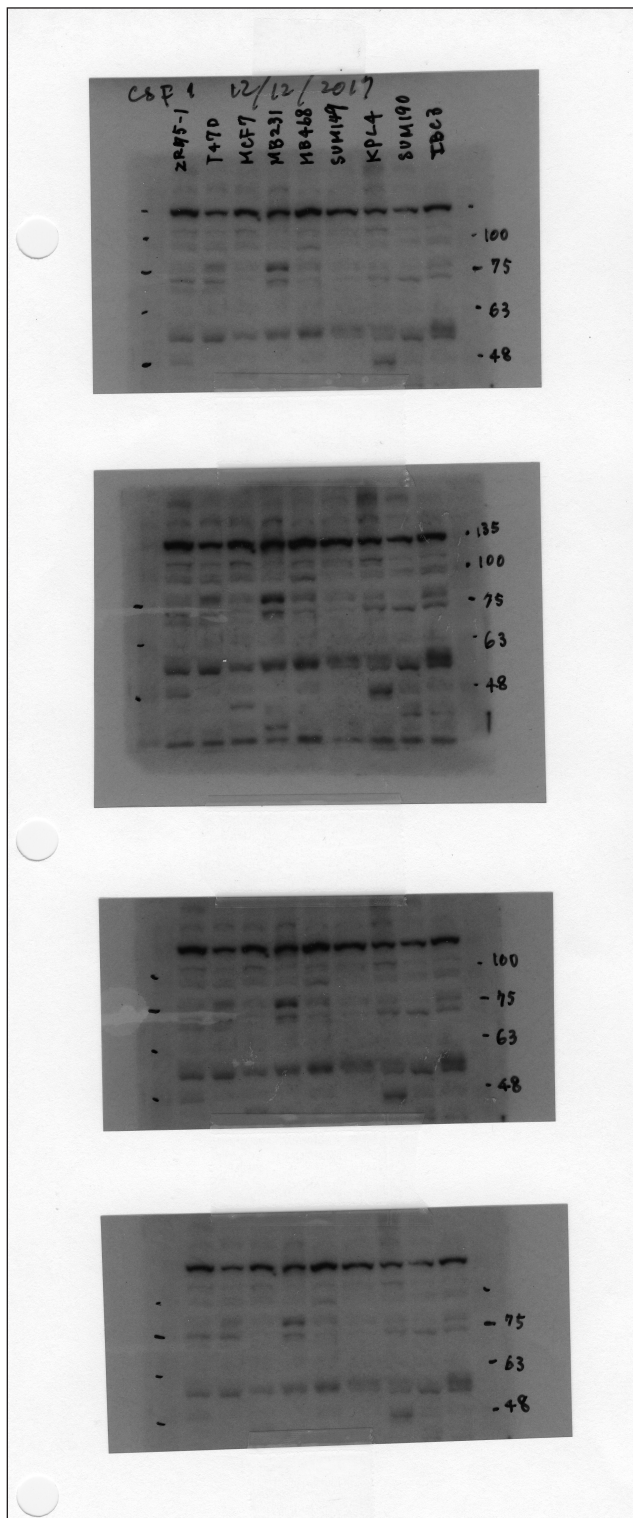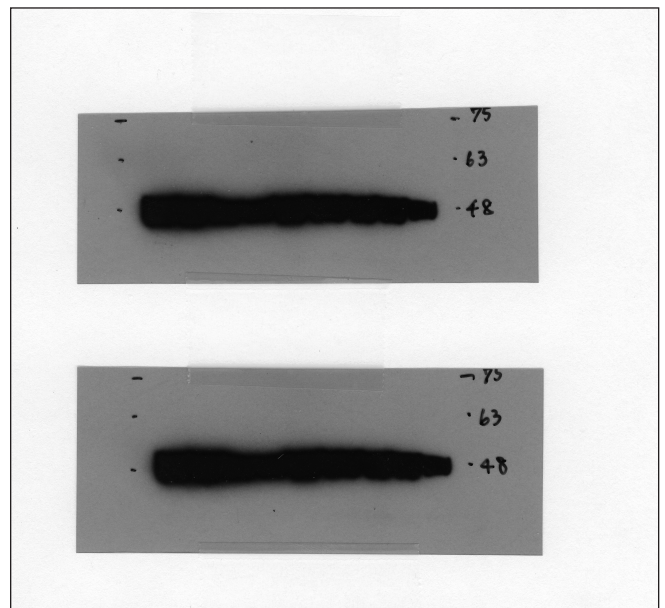

**Supplementary Figure S8. Original blot images for CSF-1 (left) and  $\beta$ -actin (right) used for Supplementary Fig. S7.**

Membrane was first probed with anti-CSF-1 antibody and detected CSF-1 (Left, molecular weight: around 70 kDa). After this detection with different exposure times, the same membrane was probed with anti- $\beta$ -actin antibody and detected  $\beta$ -actin (Right, molecular weight: 42 kDa).

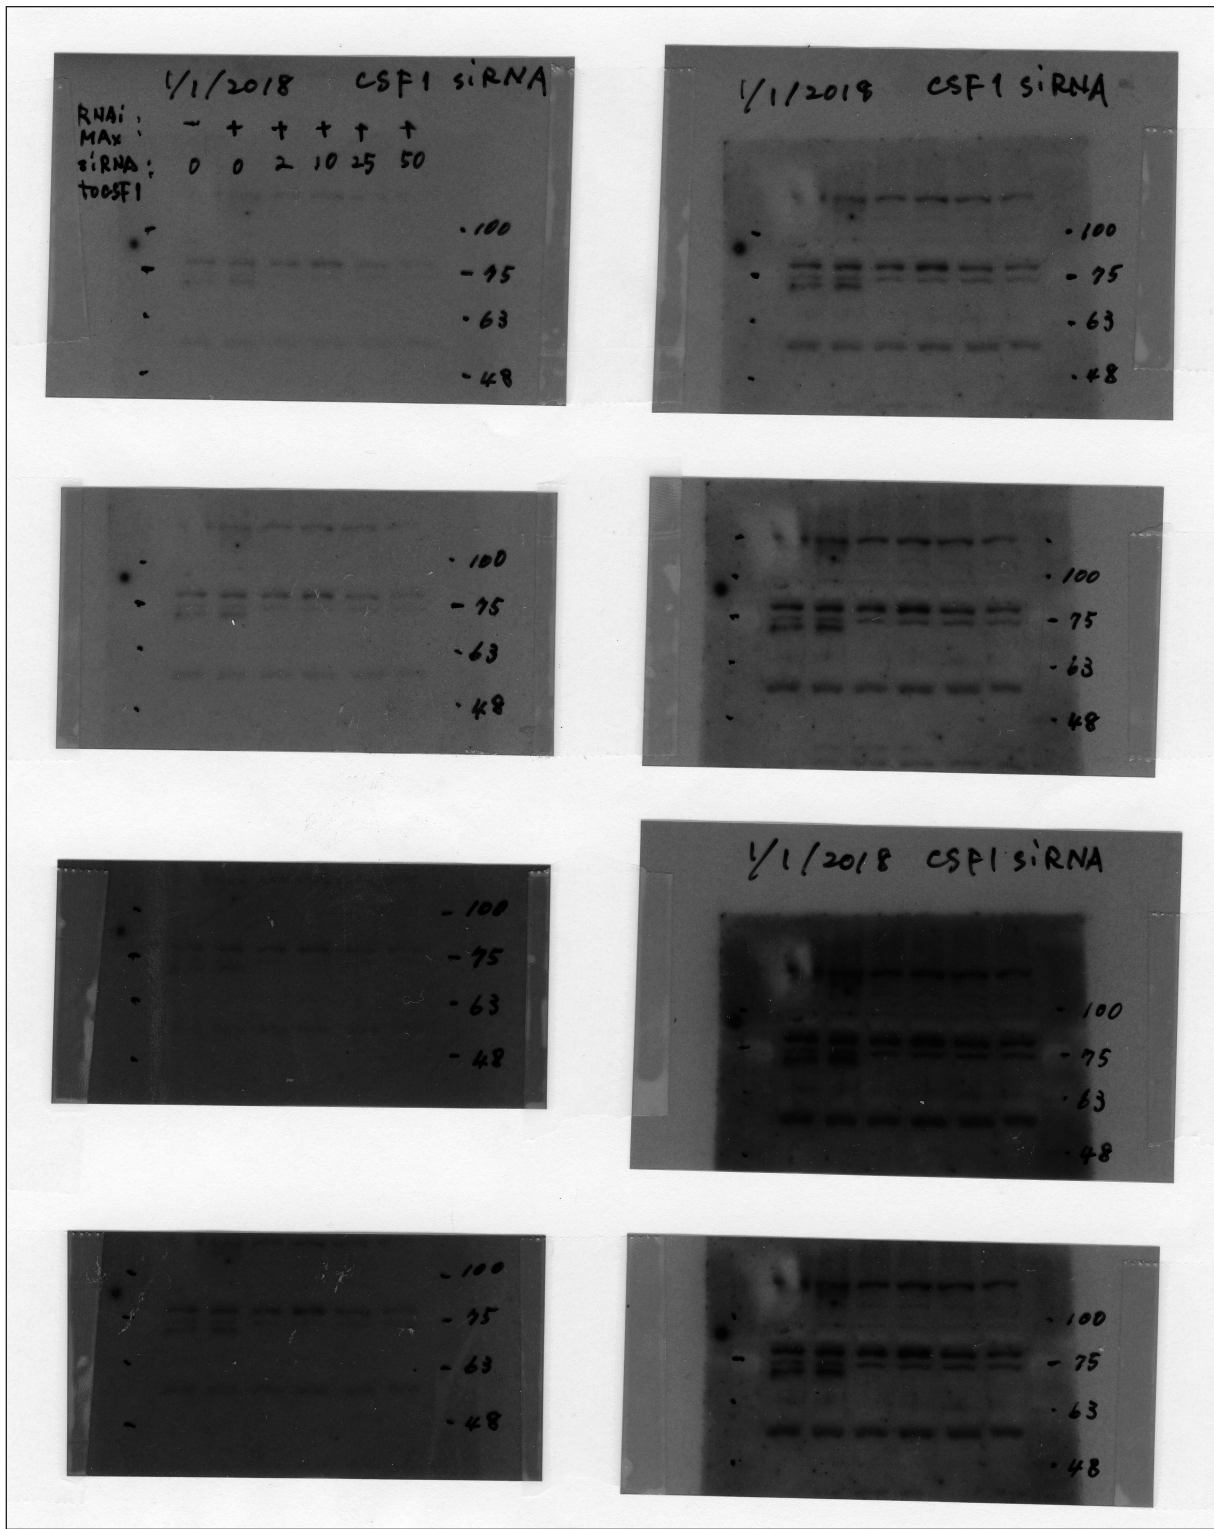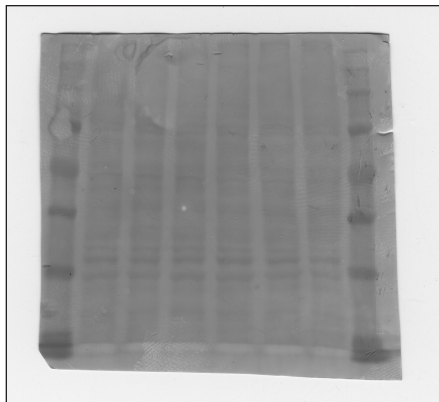

**Supplementary Figure S9. Original blot images for CSF-1 (upper) and the same membrane image after staining with Ponceau S used for Supplementary Fig. S7.**

Membrane was first probed with anti-CSF-1 antibody and detected CSF-1 (Upper, molecular weight: around 70 kDa). After this detection with different exposure times, the same membrane was processed for Ponceau S staining (Lower).

**A**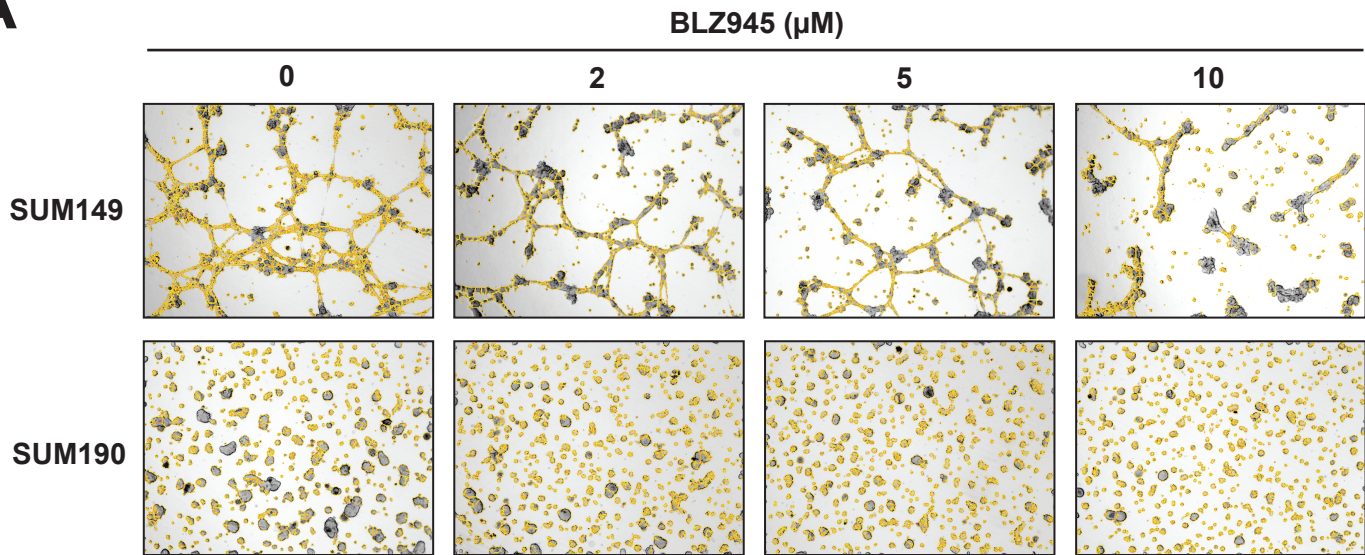**B**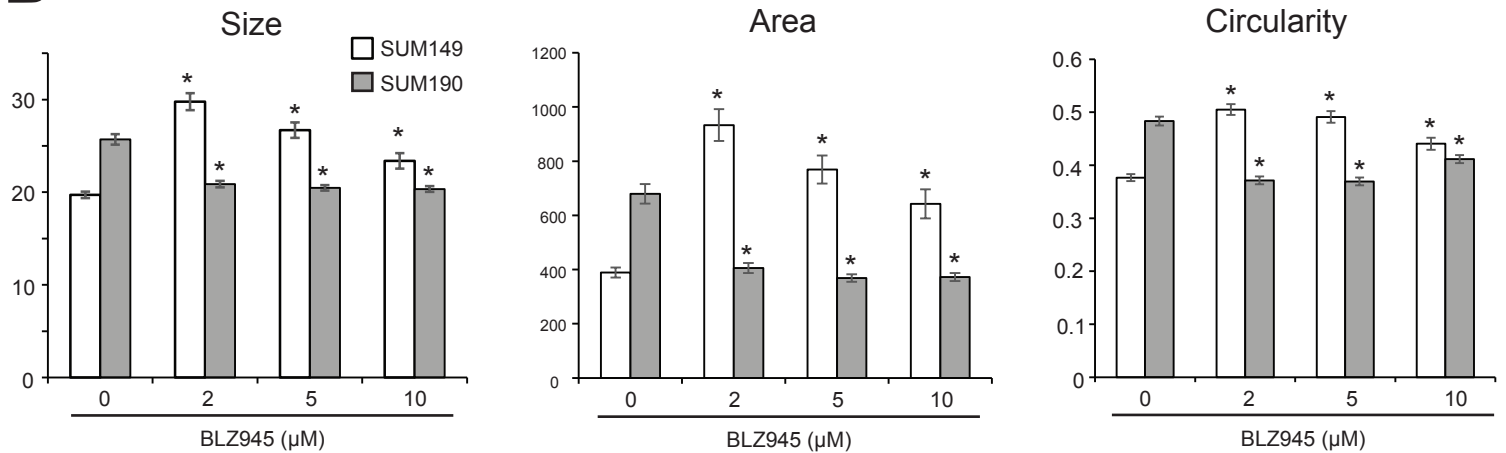

**Supplementary Figure S10. Effect of CSF-1R inhibitor BLZ945 on the morphology of IBC cells cultured in Matrigel.** **A**, Images shown in Fig. 4B were analyzed with a function of Gen5 software, Cellular Analysis, which automatically delineates the boundaries of single cells or small cell clumps and quantifies cell size, area, and circularity. **B**, Histograms depict average cell size, area, and circularity of Matrigel-cultured SUM149 and SUM190 cells treated with different concentrations of BLZ945. Every concentrations of BLZ945 induced statistically significant morphological changes compared to non-treatment in every measures; size, area, circularity, in both SUM149 and SUM190 cells. \*,  $p < 0.05$  in a comparison with the cell line-matched non-treated control.

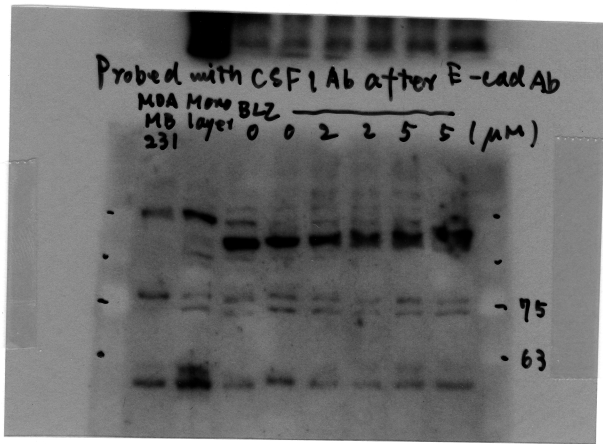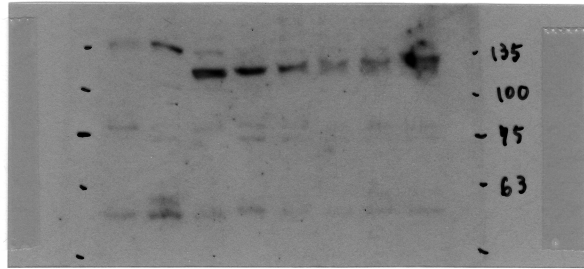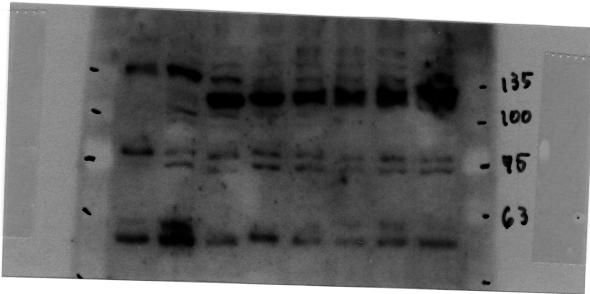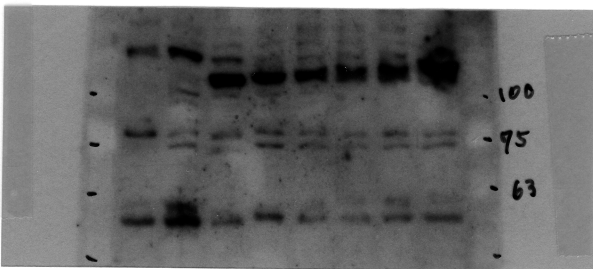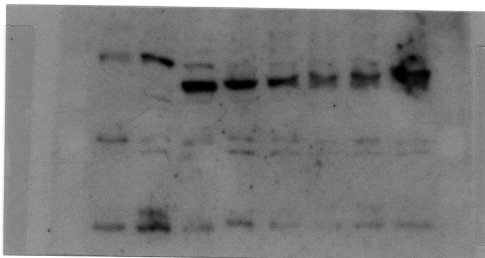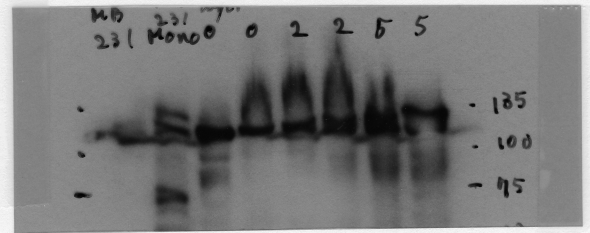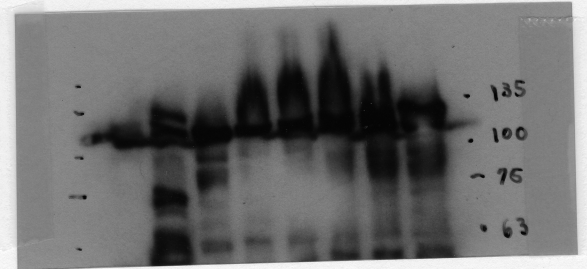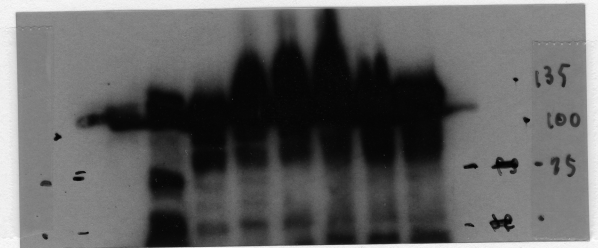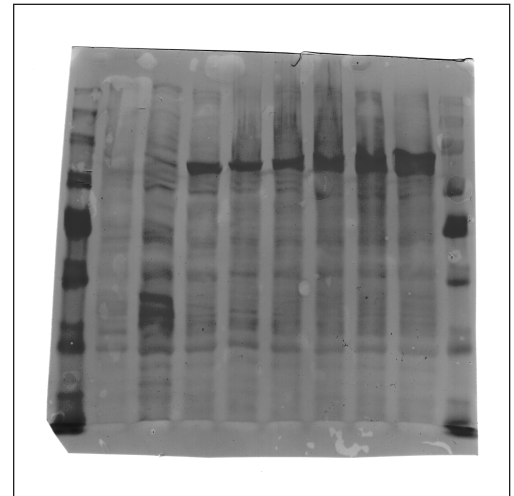

**Supplementary Figure S11. Original blot images for CSF-1 (left), E-cadherin (upper right) and the same membrane image after staining with Ponceau S used for Fig. 4D.**

Membrane was first probed with anti-E-cadherin antibody and detected (Right upper, E-cadherin molecular weight: 135 kDa), followed by the detection of CSF-1 (Left, molecular weight: around 70 kDa). After these detections with different exposure times, the same membrane was processed for Ponceau S staining (Right lower).
